# Supplementary material for: MetaCon: unsupervised clustering of metagenomic contigs with probabilistic k-mers statistics and coverage
Source: PubMed Central journal article supplement (PMC6873667; doi:10.1186/s12859-019-2904-4), 2019-11-22

# Supplementary Materials

## Table1

| Identifier    | Species                                     | NCBI Acc_No                                        |
|---------------|---------------------------------------------|----------------------------------------------------|
| ESC_COL_K12   | Escherichia coli K-12                       | NC_000913.3                                        |
| ESC_COL_O104  | Escherichia coli STEC outbreak              | NC_018658.1, NC_018659.1, NC_018660.1, NC_018666.1 |
| ESC_COL_O157  | Escherichia coli Sakai                      | NC_002127.1, NC_002128.1, NC_002695.1              |
| ESC_COL_UT189 | Escheria coli UPEC                          | NC_007941.1, NC_007946.1                           |
| ESC_COL_O127  | Escheria coli ETEC                          | NC_011601.1, NC_0116026.1, NC_603.1                |
| BAC_VUL       | Bacteroides vulgatus ATCC 8482              | NC_009614.1                                        |
| BAC_THE       | Bacteroides thetaiotaomicron VPI-5482       | NC_004703.1                                        |
| BAC_FRA       | Bacteroides fragilis 638R                   | NC_016776.1                                        |
| BAC_HEL       | Bacteroides helcogenes P 36-108             | NC_014933.1                                        |
| BAC_SAL       | Bacteroides salanitronis DSM 18170          | NC_015166.1                                        |
| CLO_DIF       | Clostridium difficile B11                   | NC_017179.1                                        |
| FAE_PRA       | Faecalibacterium prausnitzii L2-6           | NC_021042.1                                        |
| ROS_HOM       | Roseburia hominis A2-183                    | NC_015977.1                                        |
| RUM_ALB       | Ruminococcus albus 7                        | NC_014833.1                                        |
| EUB_REC       | Eubacterium rectale ATCC 33656              | NC_012781.1                                        |
| BIF_LON       | Bifidobacterium longum subsp. longum BBMN68 | NC_014656.1                                        |
| ENT_FAE       | Enterococcus faecalis D32                   | NC_018223.1                                        |
| AKK_MUC       | Akkermansia muciniphila ATCC BAA-835        | NC_010655.1                                        |
| LAC_BRE       | Lactobacillus brevis ATCC 367               | NC_008499.1                                        |
| HEL_PYL       | Helicobacter pylori Rif 1                   | NC_018937.1                                        |

**Table2**

| Identifier | Species                                             | NCBI Acc_No                                                 |
|------------|-----------------------------------------------------|-------------------------------------------------------------|
| ACH_LAI    | Acholeplasma laidlawii PG-8A                        | NC_010163                                                   |
| ACI_FER    | Acidaminococcus fermentans DSM 20731                | NC_013740                                                   |
| ACI_INT    | Acidaminococcus intestini RyC MR95                  | NC_016077                                                   |
| AKK_MAN    | Akkermansia muciniphila ATCC BAA 835                | NC_0010655                                                  |
| ALI_FIN    | Alistipes finegoldii DSM 17242                      | NC_018011                                                   |
| ALI_SHA    | Alistipes shahii WAL 8301                           | NC_021030                                                   |
| AST_EXC    | Asticcacaulis excentricus CB 48                     | NC_014816,NC_014817,NC_014818,NC_014819                     |
| BAI_CER    | Bacillus cereus E33L                                | NC_006274,NC_007103,NC_007104,NC_007105,NC_007106,NC_007107 |
| BAI_THU    | Bacillus thuringiensis serovar konkukian 97 27      | NC_005957,NC_006578                                         |
| BAC_FRA    | Bacteroides fragilis YCH46                          | NC_006297,NC_006347                                         |
| BAC_HEL    | Bacteroides helcogenes P 36 108                     | NC_014933                                                   |
| BAC_THE    | Bacteroides thetaiotaomicron VPI 5482               | NC_004663,NC_004703                                         |
| BAC_VUL    | Bacteroides vulgatus ATCC 8482                      | NC_009614                                                   |
| BIF_ADO    | Bifidobacterium adolescentis ATCC 15703             | NC_008618                                                   |
| BIF_LON    | Bifidobacterium longum NCC2705                      | NC_004307,NC_004943                                         |
| BRI_BRE    | Brevibacillus brevis NBRC 100599                    | NC_012491                                                   |
| BRE_SUB    | Brevundimonas subvibrioides ATCC 15264              | NC_014375                                                   |
| BUT_BAC    | Butyrate producing bacterium SSC 2                  | NC_021016                                                   |
| CAN_ACC    | Candidatus Accumulibacter phosphatis clade IIA UW 1 | NC_013190,NC_013191,NC_013193,NC_013194                     |
| CAN_LIB    | Candidatus Liberibacter solanacearum CLso ZC1       | NC_014774                                                   |
| CAN_PHY    | Candidatus Phytoplasma mali                         | NC_011047                                                   |
| CLA_MIC    | Clavibacter michiganensis sepedonicus               | NC_010399,NC_010407,NC_010408                               |
| CLO_ACI    | Clostridium acidurici 9a                            | NC_018657,NC_018664                                         |
| CLO_BEI    | Clostridium beijerinckii NCIMB 8052                 | NC_009617                                                   |
| CLO_BOT    | Clostridium botulinum H04402 065                    | NC_017299                                                   |
| CLO_CEL    | Clostridium cellulolyticum H10                      | NC_011898                                                   |
| CLO_CEV    | Clostridium cellulovorans 743B                      | NC_014393                                                   |
| CLO_SAC    | Clostridium cf saccharolyticum K10                  | NC_021047                                                   |
| CLO_CLA    | Clostridium clariflavum DSM 19732                   | NC_016627                                                   |
| CLO_DIF    | Clostridium difficile R20291                        | NC_013316                                                   |
| CLO_PER    | Clostridium perfringens SM101                       | NC_008262,NC_008263,NC_008264,NC_008265                     |
| CLO_PHY    | Clostridium phytofermentans ISDg                    | NC_010001                                                   |
| CLO_SAW    | Clostridium saccharolyticum WM1                     | NC_014376                                                   |
| CLO_SPS    | Clostridium SY8519                                  | NC_015737                                                   |
| CLO_STE    | Clostridium stercoarium DSM 8532                    | NC_020887                                                   |
| CLO_STI    | Clostridium sticklandii                             | NC_014614                                                   |
| CLO_THE    | Clostridium thermocellum DSM 1313                   | NC_017304                                                   |
| CLO_CAT    | Coprococcus catus GD 7                              | NC_021009                                                   |
| COP_ART    | Coprococcus ART55 1                                 | NC_021018                                                   |
| COR_GLO    | Coriobacterium glomerans PW2                        | NC_015389                                                   |
| CUP_MET    | Cupriavidus metallidurans CH34                      | NC_007971,NC_007972,NC_007973,NC_007974                     |

|         |                                                  |                                                             |
|---------|--------------------------------------------------|-------------------------------------------------------------|
| CYL_STA | Cylindrospermum stagnale PCC 7417                | NC_019744,NC_019757,NC_019758,NC_020050                     |
| DEH_SPC | Dehalobacter CF                                  | NC_018867                                                   |
| DES_DIC | Desulfotobacterium dichloroeliminans LMG P 21439 | NC_019903                                                   |
| DES_ACE | Desulfotomaculum acetoxidans DSM 771             | NC_013216                                                   |
| ECH_VIE | Echinicola vietnamensis DSM 17526                | NC_019904                                                   |
| ENT_HIR | Enterococcus hirae ATCC 9790                     | NC_015845,NC_018081                                         |
| ERY_RHU | Erysipelothrix rhusiopathiae SY1027              | NC_021354                                                   |
| ETH_SHA | Ethanoligenens harbinense YUAN 3                 | NC_014828                                                   |
| EUB_CYL | Eubacterium cylindroides T2 87                   | NC_021019                                                   |
| EUB_ELI | Eubacterium eligens ATCC 27750                   | NC_012778,NC_012780,NC_012782                               |
| EUB_REC | Eubacterium rectale ATCC 33656                   | NC_012781                                                   |
| EUB_SIR | Eubacterium siraeum V10Sc8a                      | NC_021043                                                   |
| FAE_PRA | Faecalibacterium prausnitzii                     | NC_021020                                                   |
| FIL_ALO | Filifactor alocis ATCC 35896                     | NC_016630                                                   |
| FUS_NUC | Fusobacterium nucleatum ATCC 25586               | NC_003454                                                   |
| HAE_PAR | Haemophilus parainfluenzae T3T1                  | NC_015964                                                   |
| HER_SER | Herbaspirillum seropedicae SmR1                  | NC_014323                                                   |
| JAN_MAR | Janthinobacterium Marseille                      | NC_009659                                                   |
| LAW_INT | Lawsonia intracellularis PHE MN1 00              | NC_008011,NC_008012,NC_008013,NC_008014                     |
| MEG_ELS | Megasphaera elsdenii DSM 20460                   | NC_015873                                                   |
| MES_FLO | Mesoplasma florum L1                             | NC_006055                                                   |
| MOO_THE | Moorella thermoacetica ATCC 39073                | NC_007644                                                   |
| MYC_MYC | Mycoplasma mycoides capri LC 95010               | NC_015407,NC_015431                                         |
| MYC_PUT | Mycoplasma putrefaciens Mput9231                 | NC_021083                                                   |
| ODO_SPL | Odoribacter splanchnicus DSM 20712               | NC_015160                                                   |
| OSC_VAL | Oscillibacter valericigenes                      | NC_016046,NC_016048                                         |
| PAL_PRO | Paludibacter propioniciigenes WB4                | NC_014734                                                   |
| PAR_DIS | Parabacteroides distasonis ATCC 8503             | NC_009615                                                   |
| PED_HEP | Pedobacter heparinus DSM 2366                    | NC_013061                                                   |
| PED_SAL | Pedobacter saltans DSM 12145                     | NC_015177                                                   |
| POR_GIN | Porphyromonas gingivalis ATCC 33277              | NC_010729                                                   |
| PRE_DEN | Prevotella denticola F0289                       | NC_015311                                                   |
| PRE_INT | Prevotella intermedia 17 NC 017860               | NC_017861                                                   |
| PRE_MEL | Prevotella melaninogenica ATCC 25845             | NC_014370,NC_014371                                         |
| RAL_EUT | Ralstonia eutropha JMP134 NC 007336              | NC_007337,NC_007347,NC_007348                               |
| RAL_SOL | Ralstonia solanacearum                           | NC_001399,NC_014308,NC_014309,NC_017558,NC_017559,NC_017589 |
| RHO_RUB | Rhodospirillum rubrum F11                        | NC_017584                                                   |
| RIV_SPP | Rivularia PCC 7116                               | NC_019678,NC_019679,NC_019686                               |
| ROS_INT | Roseburia intestinalis XB6B4                     | NC_021012                                                   |
| RUM_ALB | Ruminococcus albus 7                             | NC_014824,NC_014825,NC_014826,NC_014827,NC_014833           |
| RUM_BRO | Ruminococcus bromii                              | NC_021013                                                   |
| RUM_CHA | Ruminococcus champanellensis 18P13               | NC_021039                                                   |
| RUM_OBE | Ruminococcus obeum                               | NC_021022                                                   |
| RUM_SPS | Ruminococcus                                     | NC_021014                                                   |
| RUM_TOR | Ruminococcus torques                             | NC_021015                                                   |

|         |                                              |                                                                                                     |
|---------|----------------------------------------------|-----------------------------------------------------------------------------------------------------|
| SEL_RUM | Selenomonas ruminantium lactilytica TAM6421  | NC_017068,NC_017069,NC_017070,NC_017071,NC_017072,NC_017073,NC_017074,NC_017076,NC_017077,NC_017078 |
| SEL_SPU | Selenomonas sputigena ATCC 35185             | NC_015437                                                                                           |
| SPH_SPX | Sphingobacterium 21                          | NC_015277                                                                                           |
| SPI_DIM | Spiroplasma diminutum CUAS 1                 | NC_021833                                                                                           |
| SPI_SYR | Spiroplasma syrphidicola EA 1                | NC_021284                                                                                           |
| SPI_TAI | Spiroplasma taiwanense CT 1                  | NC_021832,NC_021846                                                                                 |
| STR_PAR | Streptococcus parasangnis FW213              | NC_017905                                                                                           |
| STR_PSE | Streptococcus pseudopneumoniae IS7493        | NC_015875,NC_015876                                                                                 |
| STR_THE | Streptococcus thermophilus ND03              | NC_017563                                                                                           |
| TAN_FOR | Tannerella forsythia ATCC 43037              | NC_016610                                                                                           |
| TET_HAL | Tetragenococcus halophilus                   | NC_016052                                                                                           |
| TOL_AUE | Tolumonas auensis DSM 9187                   | NC_012691                                                                                           |
| VEI PAR | Veillonella parvula DSM 2008                 | NC_013520                                                                                           |
| YER_ENT | Yersinia enterocolitica palearctica 105 5R r | NC_015224,NC_015475                                                                                 |
| YER_PSE | Yersinia pseudotuberculosis IP 32953         | NC_006153,NC_006154,NC_006155                                                                       |

**Figure 1**

**Distribution of contig length in *strain* dataset**

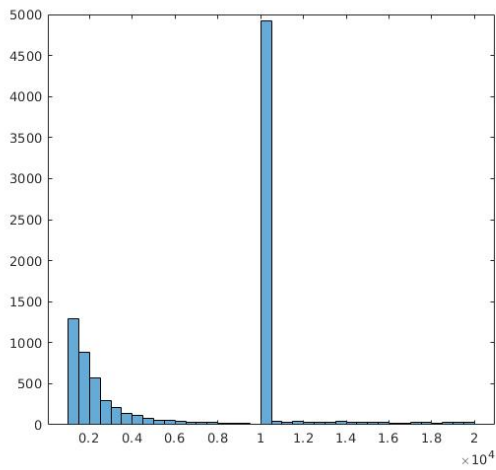

**Distribution of contig length in *species* dataset**

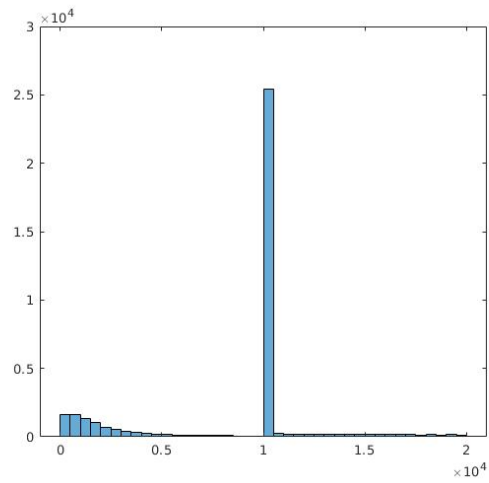

## Figure 2

Assessment of precision and recall of MetaCon while varying the threshold to filter short and long contigs (dataset *strain*).

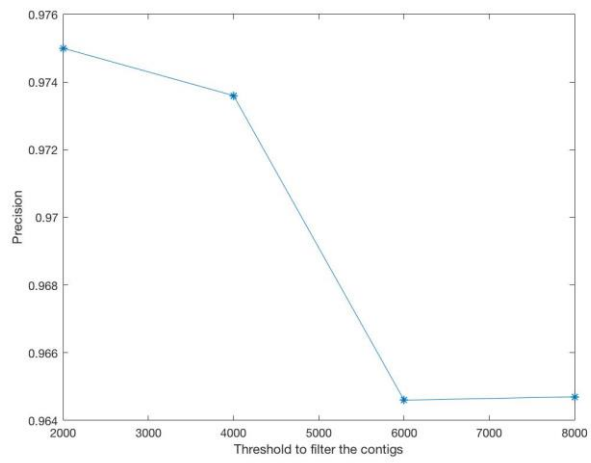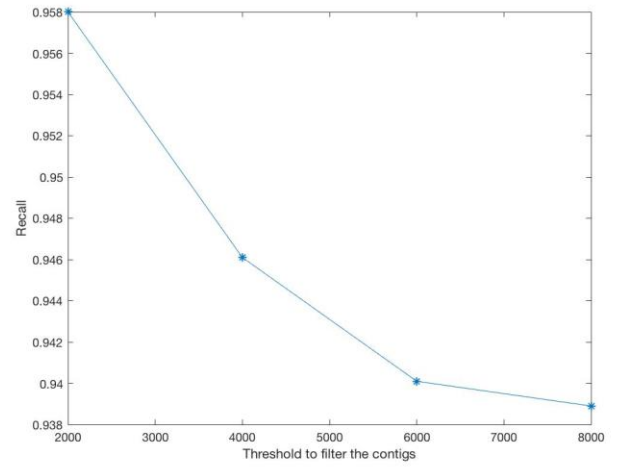

Supplement: 12859_2019_2904_MOESM1_ESM.pdf [file 12859_2019_2904_MOESM1_ESM.pdf]
